# Supplementary material
Source: PubMed Central journal article supplement (PMC5566291)
Supplement: AnnalsATS.201610-801OC_henkle_data_supplement.pdf [file AnnalsATS.201610-801OC_henkle_data_supplement.pdf]

## **Online Data Supplement**

### **Long-term Outcomes in a Population-Based Cohort with Respiratory Nontuberculous Mycobacteria Isolation**

Emily Henkle, Shannon A. Novosad, Sean Shafer, Katrina Hedberg, Sarah A.R. Siegel, Jennifer Ku, Cara Varley, D. Rebecca Prevots, Theodore K. Marras, Kevin L. Winthrop

**Supplemental Table.** Baseline characteristics of eligible patients with respiratory isolates of nontuberculous mycobacteria comparing included (deceased or consented) and not included (refused or lost to follow-up, or dead)

| Baseline Characteristics                                | Included          | Eligible, not included* |
|---------------------------------------------------------|-------------------|-------------------------|
|                                                         | N=172             | N=106                   |
| Met case criteria <sup>†</sup>                          | 102 (59.3)        | <b>53 (50)</b>          |
| Sex (female)                                            | <b>106 (61.6)</b> | <b>51 (48.1)</b>        |
| Age at isolation (median, range)                        | <b>67 (12-93)</b> | <b>58 (16-90)</b>       |
| Species: <i>M. avium</i> complex                        | 143 (83.1)        | 89 (84)                 |
| <i>M. abscessus/chelonae</i> complex                    | 8 (4.7)           | 3 (2.8)                 |
| <i>M. fortuitum</i> complex                             | 4 (2.3)           | 3 (2.8)                 |
| Other (includes unspciated) <sup>‡</sup>                | 17 (9.9)          | 11 (10.4)               |
| Cavitary disease                                        | 31 (18)           | 16 (15.1)               |
| Nodular/interstitial disease                            | 130 (75.6)        | 84 (79.2)               |
| Bronchiectasis diagnosis by physician or findings on CT | 59 (34.3)         | 28 (26.4)               |
| Bronchiectasis findings on CT only <sup>§</sup>         | 46 (26.7)         | 22 (20.8)               |
| COPD                                                    | <b>52 (30.2)</b>  | <b>19 (17.9)</b>        |
| Lung cancer                                             | 6 (3.5)           | 2 (1.9)                 |
| Prior tuberculosis                                      | 12 (7)            | 13 (12.3)               |
| Prior NTM <sup>#</sup>                                  | 9 (5.2)           | 2 (1.9)                 |
| Cystic fibrosis                                         | 3 (1.7)           | 4 (3.8)                 |
| Other lung disease                                      | 10 (5.8)          | 6 (5.7)                 |
| Non-steroid immunosuppressive medication                | <b>14 (8.1)</b>   | <b>1 (0.9)</b>          |
| Prednisone (oral)                                       | 31 (18)           | 13 (12.3)               |
| Inhaled corticosteroid with or without LABA             | 16 (9.3)          | 11 (10.4)               |

Numbers are N (%) except as noted

Bolded comparisons p<0.05, compared to Eligible, not included.

**Abbreviations/definitions:** CT=computed tomography; COPD= chronic obstructive pulmonary disease; Other lung disease=interstitial lung disease, sarcoidosis, or allergic bronchopulmonary aspergillosis; Non-steroid immunosuppressive medications=methotrexate, tacrolimus, cyclosporine, biologics, azathioprine; LABA=long acting beta-agonist

\*N=56 not finable, N=47 refused consent, N=3 deceased within VA system and access to records not granted

<sup>†</sup>Griffith ATS/IDSA 2007 AJCCRM

‡Other species: 5 cases= 2 unspciated, 1 each *M. xenopi*, *M. simiae*, and *M. goodii* and 12 non-cases= 10 unspciated, 1 each *M. mucogenicum* and *M. simiae* complex.

#History of NTM isolation prior to baseline period

§134 included had CT scan (34.3% had bronchiectasis); 83 not included had CT scan (26.5% had bronchiectasis, p=0.23 for comparison)
